# Supplementary material for: Global and local perturbation of the tomato microRNA pathway by a trans-activated DICER-LIKE 1 mutant
Source: PubMed Central journal article supplement (PMC3904720; doi:10.1093/jxb/ert428), 2013-12-27
Supplement: supp_ert428_jexbot110684_file001.pdf [file supp_ert428_jexbot110684_file001.pdf]

Journal of Experimental Botany, Global and local perturbation of the tomato microRNA pathway by a trans-activated DICER-LIKE 1 mutant

Michael Kravchik<sup>1</sup>, Ramanjulu Sunkar<sup>2</sup>, Subha Damodharan<sup>1</sup>, Ran Stav<sup>1</sup>, Matat Zohar<sup>3</sup>, Tal Isaacson<sup>3</sup> and Tzahi Arazi<sup>1,\*</sup>

### Supplementary figures

**Fig. S1** Sequence analysis of the tomato DCL1 homolog. (A) Scheme illustration of the gene, mRNA and protein structure of *SIDCL1*. In the gene, exons are represented by white boxes, introns and putative promoter and terminator sequences are shaded in black and dark grey, respectively. The location of the fragment used for silencing is indicated (*SIDCL1IR*). In the mRNA, 5' and 3' UTR sequences as determined by RACE are shaded in light grey and the predicted Watson-Crick pairing between sly-miR162 and target *SIDCL1* sequence is shown. Below, scheme of the predicted SIDCL1 protein structure compared to *Arabidopsis* (At) and rice (Os) DCL1s. The scheme shows in each protein the relative location of identified domains. (B) Accumulation of *SIDCL1* transcript in different tissues of tomato cv. Heinz based on published RNA-seq data from the tomato genome consortium 2012, Supplementary Table S1. Data are means of normalized expression of two independent biological samples. MG - mature green; Br - breaker.

**Fig. S2** Effect of *SIDCL1* silencing on *SIDCL2*-derived siRNAs accumulation. Schematic of *35S*>>*SIDCL1IR* and control siRNAs accumulation at indicated *SIDCL2*. The normalized abundances of siRNAs were plotted relative to their mRNA sequence as a function of the positions of their 5' ends. Values above and below zero indicate siRNAs

matching the plus and minus strand, respectively. The miR6026 cleavage site is indicated. Bar = 21 nts.

**Fig. S3** Additional phenotypes of *FIL*>>*SIDCL1IR* plants. From top to bottom, control (*FIL:LhG4*) and *FIL*>>*SIDCL1IR* 7 DAS seedlings, the width of the pot is 7 cm; Representative 30 DAS cotyledons; Representative 42 DAS plants, white arrowheads mark the position of representative axillary meristems, which are dormant and active in *FIL:LhG4* and *FIL*>>*SIDCL1IR* plants, respectively, asterisks mark leaves that were cut to enable better visualization of the nodes. Inset shows representative cotyledonary axillary meristem outgrowth at a higher magnification. Scale bar = 1 cm.

**Fig. S4** Quantitative analysis of *SIDCL1* levels in transactivated flowers. QRT-PCR analysis of *SIDCL1* expression levels in (A) Less than 1 mm *API*>>*SIDCL1IR* buds (B) isolated *AP3*>>*SIDCL1IR* petals from 10 mm buds. *TIP41* and *CAC* genes were used as reference genes in A and B, respectively. Error bars indicate  $\pm$  SD of three biological replicates, each measured in triplicate. Asterisks indicate significant difference as determined by Student's *t* test ( $P \leq 0.01$ ).

A

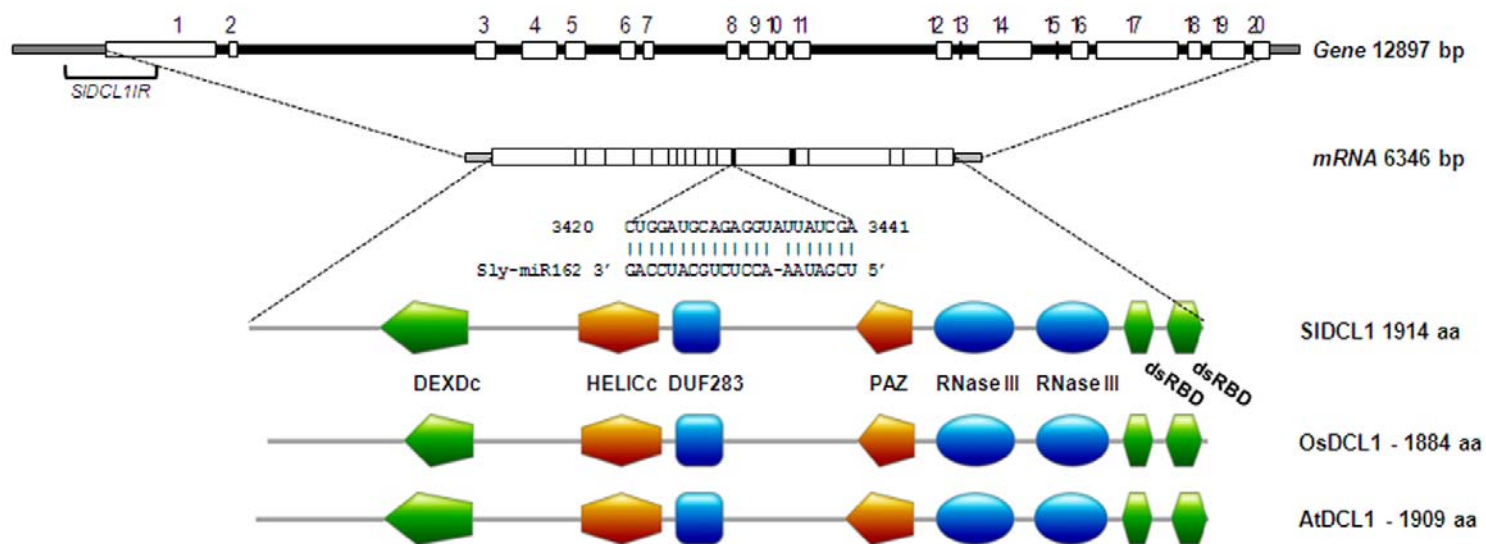

B

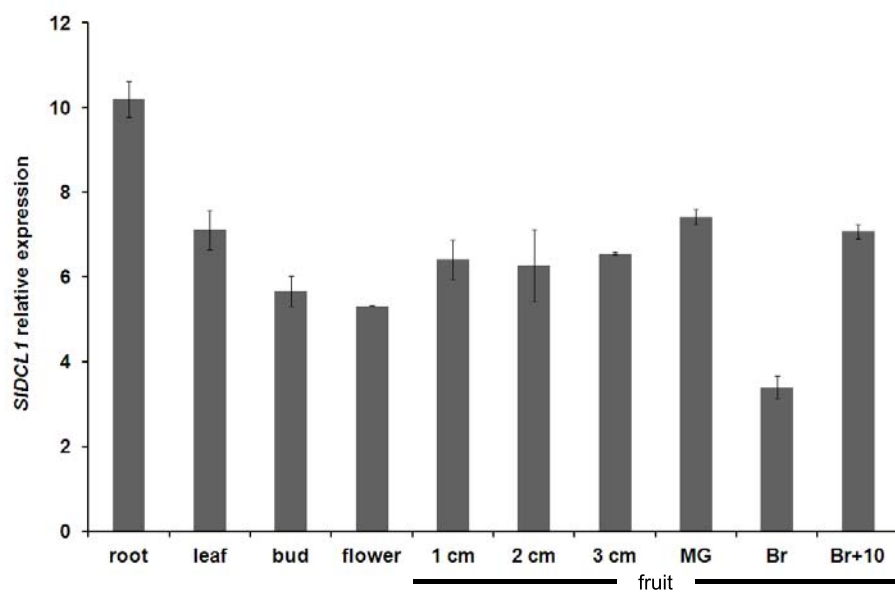

Figure S1

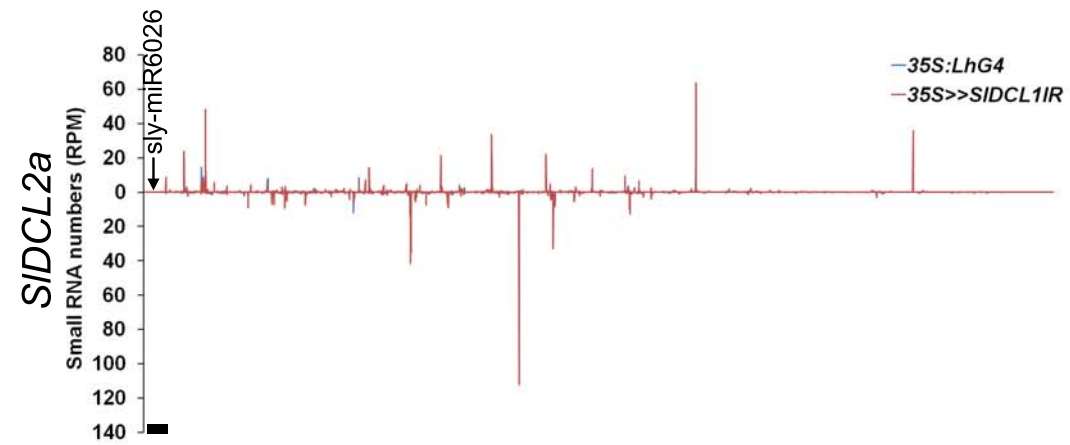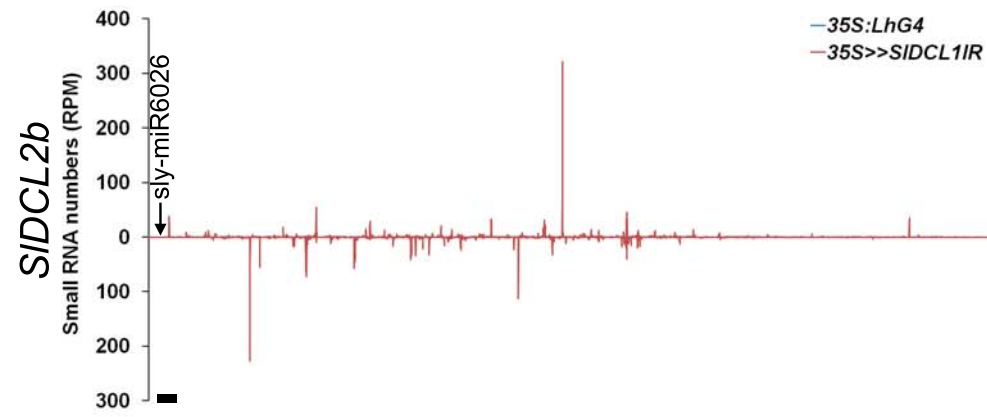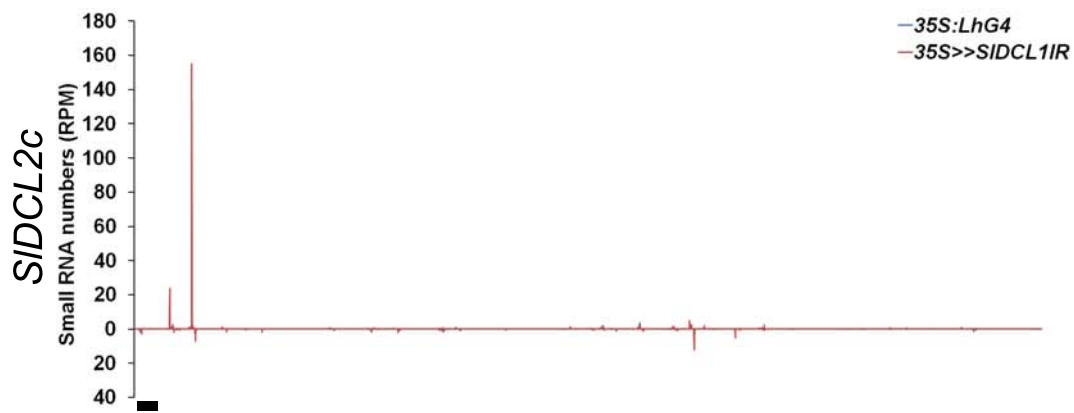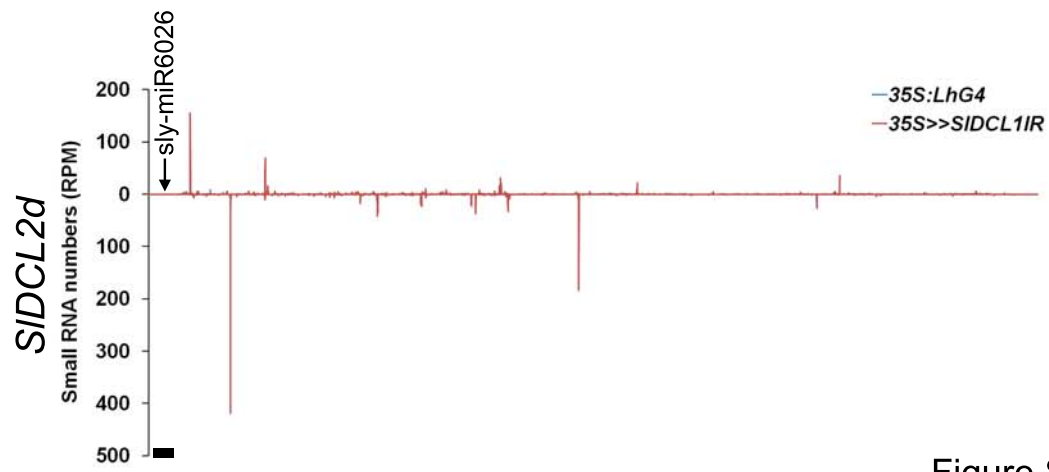

Figure S2

A

*FIL:LhG4*

*FIL>>SIDCL1IR*

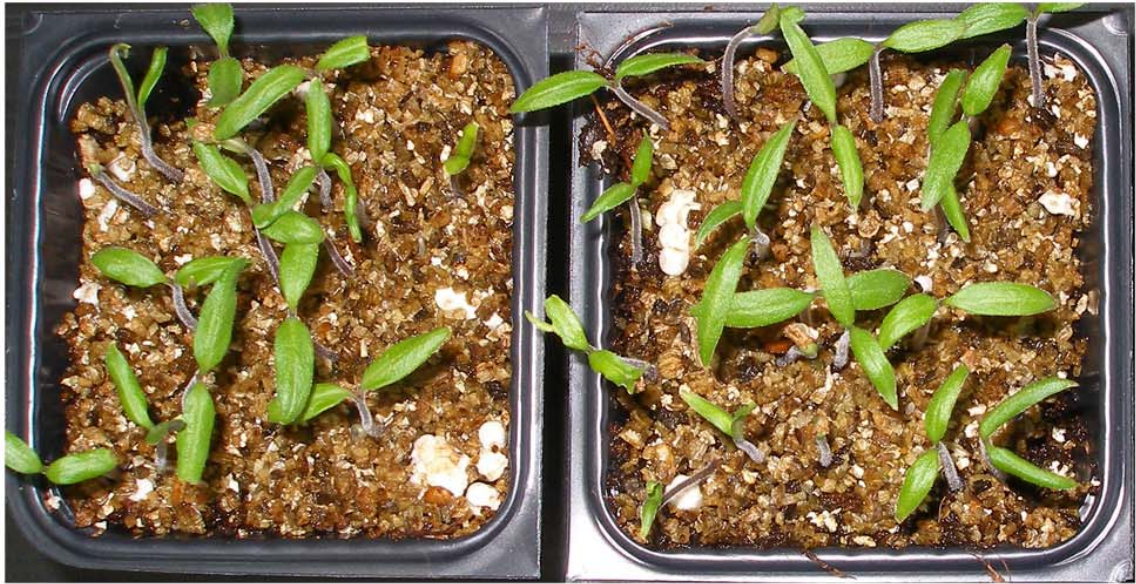

B

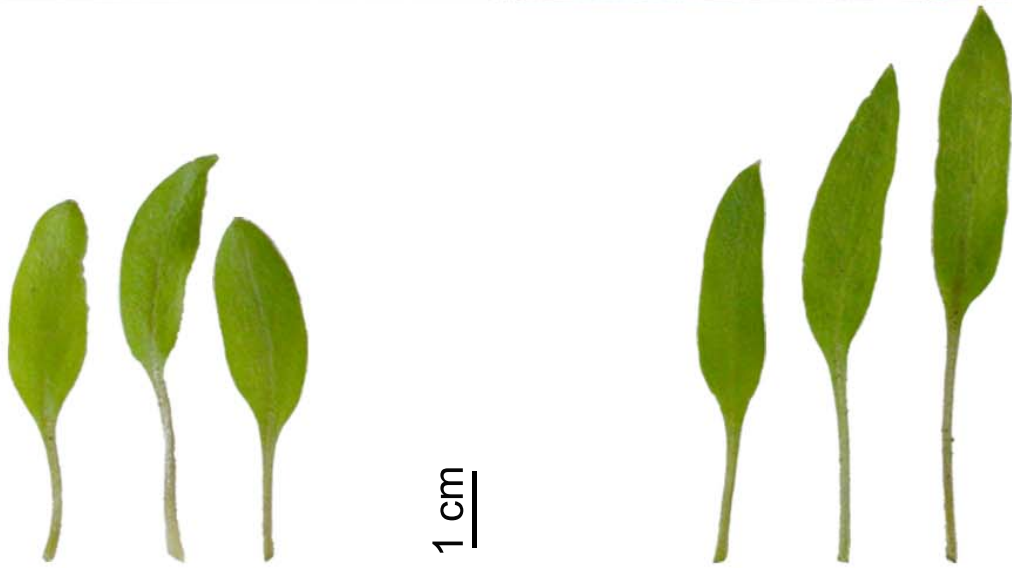

C

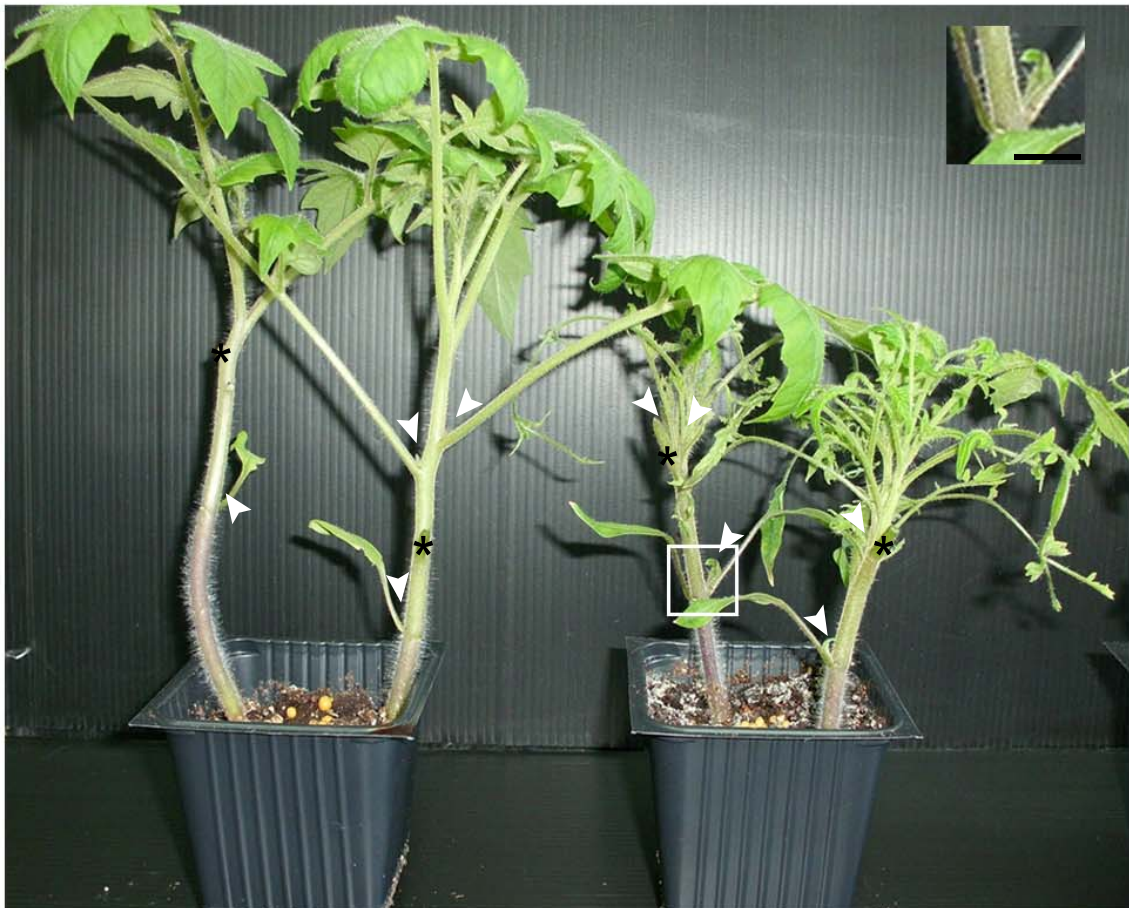

Figure S3



**A**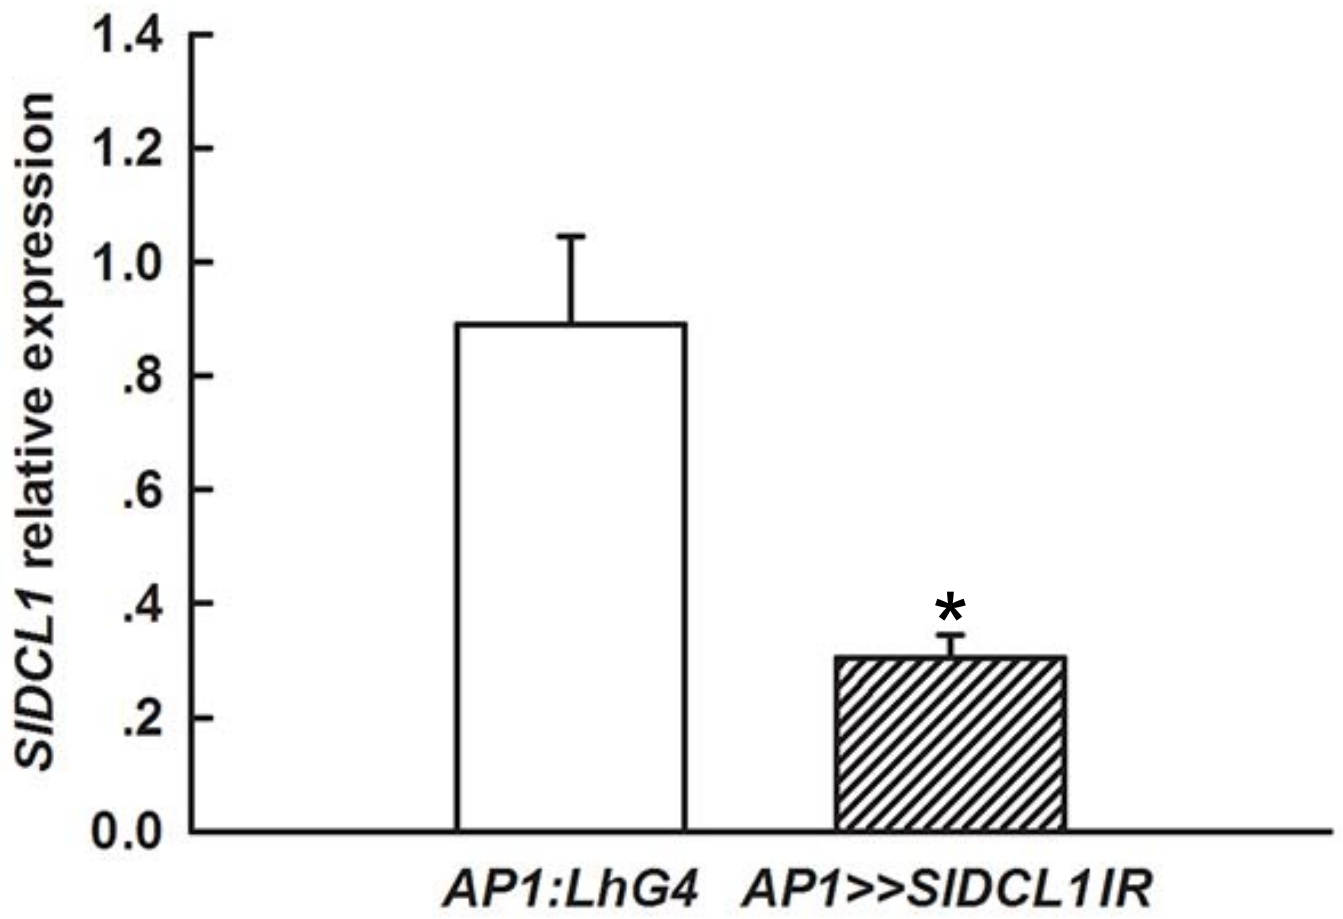**B**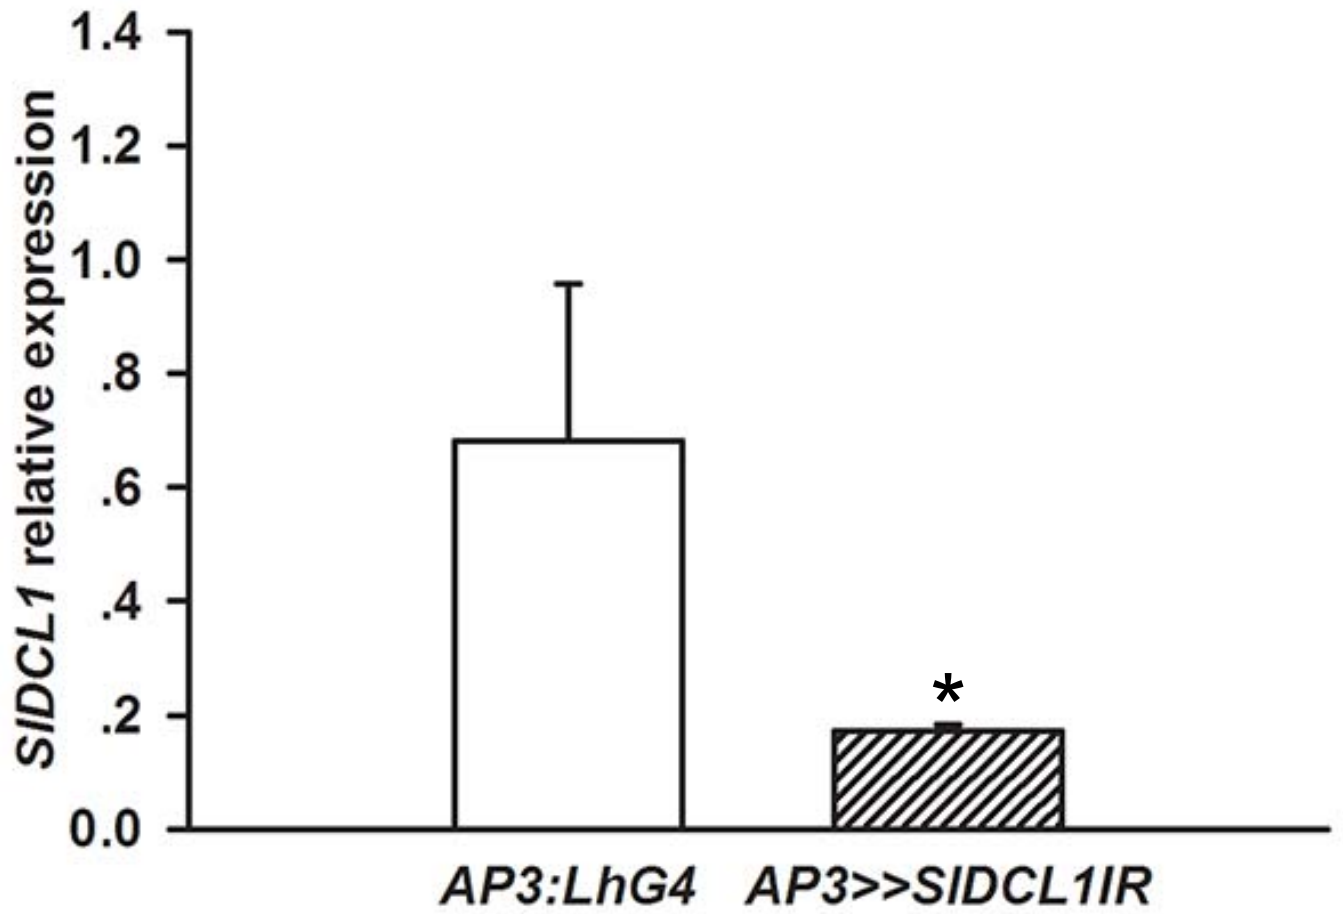

Figure S4

Supplementary Table S1. Primers and probes used in this study

| Primer ID              | Primer sequence (5' - 3') <sup>abc</sup>             | Remarks                                        |
|------------------------|------------------------------------------------------|------------------------------------------------|
| GeneRacer-5'           | CGACTGGAGCACGAGGACACTGA                              | 5' and 3' RACE                                 |
| GeneRacer-5'-nested    | GGACACTGACATGGACTGAAGGAGTA                           |                                                |
| GeneRacer-3'           | GCTGTCAACGATACGCTACGTAACG                            |                                                |
| GeneRacer-3'-nested    | CGCTACGTAAACGGCATGACAGTG                             |                                                |
| S1DCL1-5'-RACE         | TTCAGCAGCGTCTGATAGAAAC                               |                                                |
| S1DCL1-5'-RACE-nested  | AAAGCCAAGGATTCCGCGAGCAGCTCTTCTA                      |                                                |
| S1DCL1-3'-RACE         | TGTGGCCCGTTGTCCTTGCAAATTC                            |                                                |
| S1DCL1-3'-RACE-nested  | TCAAGAGTCTCATCCGGACCCAATTGAT                         |                                                |
| S1DCL2a_F_28           | CTGCTGGCAAACATCCTCTT                                 |                                                |
| S1DCL2d_R_280          | GTCGGTATGCAACATCAGAGC                                |                                                |
| S1DCL2b-5'-RACE        | GCATCATCAGAGCATCTCCTTGCTGAGTCACTA                    |                                                |
| S1DCL2b-5'-RACE-nested | TGCAAATGGCAAAGGATCAGCAGAGACTA                        |                                                |
| S1DCL1IRRNA_R          | <u>CCC<u>AAGCTTGAATTC</u>CTCATAAGCATCAATCCAAT</u>    | S1DCL1 RNAi construct                          |
| S1DCL1IRRNA_F          | <u>ACGCGT<u>CGACTG</u>CAGCAGATATTAAGTCCGAAAGATCA</u> |                                                |
| S1DCL1IRRNA_F          | GGTTGCTAGGTCACAGGAGCA                                |                                                |
| S1DCL1IRRNA_R          | CAGCTTCAGTGGACTCTCTGGA                               |                                                |
| S1DCL1_F_XhoI          | <u>CCGCTCGAGGGTTGCTAGGTCACAGGAGCA</u>                |                                                |
| S1DCL1_F_898           | GTGGTCTGTTGGTGAAGAGAT                                | S1DCL1 sequencing                              |
| S1DCL1_F_2481          | AGTCAAGAAATGCGAACAGGTC                               |                                                |
| S1DCL1_F_3227          | GGATTTTGTTCGGAAAGGAT                                 |                                                |
| S1DCL1_F_4019          | TGCAGCTCACTCTGGAAGA                                  |                                                |
| S1DCL1_R_1892          | CCTCTAGCTCCAGCATCACA                                 |                                                |
| S1DCL1_R_2685          | TATAATCTGATCCGGGCTTACG                               |                                                |
| S1DCL1_R_6168          | TTCAGCAGCGTCTGATAGAAAC                               |                                                |
| pFlap_intron_F         | AATTTCTTGTTCGGATCCTCATA                              |                                                |
| OCS_rev                | GAAACCGGGTAAGGATCT                                   | Transgene identification                       |
| qRT-SGN-U592620_F      | TTCAGGCCTCTGAACATATTGCT                              | <i>SIHAM</i>                                   |
| qRT-SGN-U592620_R      | CAACTGCAGAGCCTCCTTTGATA                              |                                                |
| qRT-Solyc03g115850_F   | CCACCATTGACAGATTTCATCG                               |                                                |
| qRT-Solyc03g115850_R   | GGTGAACGAAGTCGGAAGAG                                 | NAC domain protein ( <i>Solyc03g115850.2</i> ) |
| qRT-S1ARF3_F           | AACTACATTTCTCCCTTCCAG                                | Real time primers                              |
| qRT-S1ARF3_R           | TCACAACAACACCTGCTAC                                  |                                                |
| qRT-S1ARF4_F           | CGAAAGAACCATCTACTCC                                  | Real time primers                              |
| qRT-S1ARF4_R           | AAAGCCTCTCCAACCTCAAC                                 |                                                |
| qRT-S1ARF10_F          | CAGGTCCAGCAGTCCCTTTCT                                | Real time primers                              |
| qRT-S1ARF10_R          | CGCTGGAACCTTGGTGGTAA                                 |                                                |
| qRT-TIP41_F            | ATGGAGTTTGTGAGTCTCTGTC                               | Real time primers                              |
| qRT-TIP41_R            | GCTGCGTTTCTGGCTTAGG                                  |                                                |
| qRT-S1DCL1_F           | TCGAAGGACCCATCTTAACTG                                | Real time primers                              |
| qRT-S1DCL1_R           | CTATTGGCCCTCTGAAGACAAG                               |                                                |
| qRT-S1DCL2a_F          | CGGCTTCCGAAGAAGGTA                                   | Real time primers                              |
| qRT-S1DCL2a_R          | TTCAGCACTAGTCAAGAA                                   |                                                |
| qRT-S1DCL2b_F          | TGCAGGACATATTTCTGTGGTC                               | Real time primers                              |
| qRT-S1DCL2b_R          | TGAACATCCAAGCCCTCTTC                                 |                                                |
| qRT-S1DCL2d_F          | GCTCAACTCTAAATTTGGATTCTCTG                           | Real time primers                              |
| qRT-S1DCL2d_R          | AACTCTTTGAGTGTCTTCAGTGT                              |                                                |
| qRT-S1DCL3_F           | TTGCCACTGATGTGGTTGAG                                 | Real time primers                              |
| qRT-S1DCL3_R           | TCCCTCTGCTCTTGTGTTCC                                 |                                                |
| qRT-S1DCL4_F           | AGTGAAGCTCAGATGGATGATG                               | Real time primers                              |
| qRT-S1DCL4_R           | GCAGAAATACTCGTCTGTGTTG                               |                                                |
| qRT-S1CAC F            | CCTCCGTTGTGATGATGTAACCTGG                            | Real time primers                              |
| qRT-S1CAC R            | ATTGGTGGAAAGTAACATCAT                                |                                                |
| sly-miR160a_rc         | TGGCATACAGGGAGCCAGGCA                                | sly-miR160a probe                              |
| sly-miR164_rc          | TGCACGTGCCCTGCTTCTCCA                                | sly-miR164 probe                               |
| sly-miR171_rc          | GATATTGGCAGGCTCAATCA                                 | sly-miR171 probe                               |
| sRNA_id_1941824_rc     | AGAGACACACTTATACTATACTAA                             | <i>TAPIR</i> probe                             |
| sly-miR390_rc          | GGTGTATCCCTCTGAGCTT                                  | sly-miR390 probe                               |
| sRNA_ID1897365_rc      | AGTCTTTGCTCTAAGGCCACA                                | TAS5 probe                                     |
| sRNA_ID477247_rc       | GGCCCAAAGACAACATGAAGT                                | TAS4 probe                                     |

<sup>a</sup>Sequences corresponding to restriction enzyme sites are underlined.

**Supplementary Table S2.** Summary of small RNA profiling

|                                        | <i>35S:LhG4-1</i> | <i>35S:LhG4-2</i> | <i>35S&gt;&gt;SIDCL1IR-1</i> | <i>35S&gt;&gt;SIDCL1IR-2</i> |
|----------------------------------------|-------------------|-------------------|------------------------------|------------------------------|
| Raw Reads <sup>a</sup>                 | 4,975,066         | 5,619,906         | 3,907,268                    | 4,519,122                    |
| Genome-matched reads                   | 3,487,457         | 4,008,933         | 2,730,156                    | 3,223,011                    |
| Ratio <sup>b</sup>                     | 70                | 71.3              | 70                           | 71.3                         |
| t/r/sn/snoRNA                          | 1,047,049         | 1,143,490         | 839,552                      | 1,115,895                    |
| Ratio <sup>c</sup>                     | 30.0              | 28.5              | 30.8                         | 34.6                         |
| Available small RNA reads <sup>d</sup> | 2,440,408         | 2,865,443         | 1,890,604                    | 2,107,116                    |
| Unique sRNA sequences                  | 899,019           | 1,139,600         | 854,896                      | 923,666                      |
| Total hits on genome <sup>e</sup>      | 9,503,296         | 11,811,550        | 9,090,523                    | 9,438,606                    |

<sup>a</sup>Total acquired sequencing data from Illumina Hiseq 200 analyzer (18-26 nucleotide), 5' and 3' adaptors have been trimmed.

<sup>b</sup>The ratio represents the percentage of genome-matched reads to the raw reads.

<sup>c</sup> The ratio represents the percentage of t/r/sn/snoRNAs reads to the genome-matched reads.

<sup>d</sup>The reads excluding the t/r/sn/snoRNAs and unmapped reads.

<sup>e</sup> Sum of the hits of all the available unique small RNA sequence on related tomato genome.



**Supplementary Table S3.** Summary of small RNA annotations

|                                        | <i>35S:LhG4-1</i> | <i>35S:LhG4-2</i> | <i>35S&gt;&gt;SIDCLIIR-1</i> | <i>35S&gt;&gt;SIDCLIIR-2</i> |
|----------------------------------------|-------------------|-------------------|------------------------------|------------------------------|
| Available small RNA reads <sup>a</sup> | 2,440,408         | 2,865,443         | 1,890,604                    | 2,107,116                    |
| RNAi loci associated                   | 175               | 17                | 6,601                        | 7,136                        |
| Unannotated                            | 1,574,705         | 1,864,450         | 1,363,737                    | 1,466,600                    |
| cDNA associated                        | 287,865           | 326,764           | 237,490                      | 291,913                      |
| miRNA associated                       | 252,851           | 313,790           | 72,018                       | 101,023                      |
| Pre-miRNA associated                   | 173,586           | 182,012           | 76,723                       | 95,713                       |
| Repeat associated                      | 151,226           | 178,410           | 134,035                      | 144,731                      |

<sup>a</sup> The reads excluding the t/r/sn/snoRNAs and unmapped reads (clean).
